## Beyond Schizophrenia: The Role of *DISC1* in Major Mental Illness

William Hennah<sup>1,2</sup>, Pippa Thomson<sup>1,3</sup>, Leena Peltonen<sup>2,4,5</sup>,  
and David Porteous<sup>3</sup>

<sup>2</sup>Department of Molecular Medicine, National Public Health Institute, Helsinki, Finland; <sup>3</sup>Medical Genetics Section, University of Edinburgh, Edinburgh, Scotland; <sup>4</sup>Department of Medical Genetics, University of Helsinki, Helsinki, Finland; <sup>5</sup>The Broad Institute, Massachusetts Institute of Technology, Boston, MA, USA

Schizophrenia and related disorders have a major genetic component, but despite much effort and many claims, few genes have been consistently replicated and fewer have biological support. One recent exception is “Disrupted in Schizophrenia 1” (*DISC1*), which was identified at the breakpoint on chromosome 1 of the balanced translocation (1;11)(q42.1;q14.3) that co-segregated in a large Scottish family with a wide spectrum of major mental illnesses. Since then, genetic analysis has implicated *DISC1* in schizophrenia, schizoaffective disorder, bipolar affective disorder, and major depression. Importantly, evidence is emerging from genetic studies for a causal relationship between *DISC1* and directly measurable trait variables such as working memory, cognitive aging, and decreased gray matter volume in the prefrontal cortex, abnormalities in hippocampal structure and function, and reduction in the amplitude of the P300 event-related potential. Further, *DISC1* binds a number of proteins known to be involved in essential processes of neuronal function, including neuronal migration, neurite outgrowth, cytoskeletal modulation, and signal transduction. Thus, both genetic and functional data provide evidence for a critical role for *DISC1* in schizophrenia and related disorders, supporting the neurodevelopmental hypothesis for the molecular pathogenesis of these devastating illnesses.

**Key words:** genetics/animal models/neuroimaging/  
expression studies/neurodevelopment

Genetic analysis of schizophrenia has been ongoing for a number of decades, often with rather disappointing results. Most initial observations have not been successfully independently replicated. Recent encouraging

exceptions are *DTNBP1* and *NRG1*.<sup>1,2</sup> Here we focus on a third example, *DISC1*, which was thrown into the limelight when it was included as part of *Science* magazine’s nominations for the “Scientific Breakthroughs of the Year, 2005.”<sup>3</sup> The *DISC1* story has captured not just the attention of geneticists but also of investigators in a number of other disciplines, including cell biology, animal models, and neuroimaging. This work has highlighted the possible involvement of *DISC1* in predisposing individuals to a wide range of psychiatric conditions, psychological traits, and biological phenotypes. A number of key central nervous system proteins have also been identified as interacting partners, introducing the concept of the *DISC1* pathway in normal and disturbed brain development and function.

### Family Evidence

*DISC1* was first identified in genetic studies of a large Scottish family in which a chromosomal translocation was found to segregate with mental illness. Microdissection of the translocated chromosomes identified the breakpoint on chromosome 1 at 1q42.2,<sup>4</sup> and subsequent analysis identified 2 genes directly disrupted by the translocation, Disrupted in Schizophrenia 1 and 2 (*DISC1* and *DISC2*).<sup>5,6</sup> Initially, 77 members of the translocation family were available for cytogenetic analysis, and 34 carried the balanced translocation between chromosomes 1 and 11, t(1;11). The translocation segregated with a broad range of diagnoses, with the maximum LOD score of 4.3 being reached when schizophrenia, schizoaffective disorder, recurrent major depression, adolescent conduct disorder, and emotional disorders were used as a broad diagnostic class in the model.<sup>7</sup> Long-term follow-up of the family has identified additional cases of major psychiatric illness among translocation carriers, which continues to support the hypothesis that the translocation is sufficient in its own right to cause major psychiatric illness within this family.<sup>8,9</sup> The individuals continue to display a range of diagnoses: 7 individuals are affected with schizophrenia, 1 individual with bipolar disorder, 10 with recurrent major depression, 2 with adolescent conduct and emotional disorder, and 1 case of minor depression. The follow-up has increased the LOD score to 7.1 when those individuals with schizophrenia, bipolar disorder, and recurrent major depression are included. None of

<sup>1</sup>To whom correspondence should be addressed; e-mail: william.hennah@ktl.fi or pippa.thomson@ed.ac.uk.

the family members with a normal karyotype have a major psychiatric diagnosis. Family members with a psychiatric diagnosis are not distinguishable from unrelated individuals of the same diagnosis and have no concurrent physical, neurological, or dysmorphic conditions.<sup>8</sup> Neither do the translocation carriers differ from familial non-translocation carriers in intelligence quotient (IQ), measured using the National Adult Reading Test.<sup>8</sup>

Measurements of auditory P300 event-related potential (ERP) in family members indicate a direct involvement of the translocation as a risk factor for the development of psychiatric illness. Auditory P300 is known to be abnormal in patients with schizophrenia and their first-degree relatives and has been proposed as a trait marker of risk for schizophrenia.<sup>10–12</sup> Translocation carriers showed significant reduction in the amplitude of the P300 ERP compared with family members without the translocation and unrelated controls, but similar to unrelated schizophrenics.<sup>8</sup> The abnormality of P300 ERP was independent of psychiatric symptoms, with 2 translocation carriers without diagnosis showing amplitude reductions of less than 2 standard deviations below the control mean. The genetic model of schizophrenia within the t(1;11) family is most consistent with a dominant model with reduced penetrance.<sup>9</sup> Consistent with this, levels of DISC1 protein are approximately halved in t(1;11) lymphoblastoid cell lines.<sup>13</sup>

To date, no other family has been identified with a translocation in *DISC1*, but this is not unexpected due to the rarity of such events. However, a frameshift mutation in *DISC1* was recently reported in an American family.<sup>14</sup> The frameshift was identified in an individual with schizophrenia and was also present in 2 siblings, one with schizophrenia and the other with schizoaffective disorder, and the unaffected father. By contrast with the t(1;11) mutation, this frameshift mutation does not segregate consistently with major mental illness. It was not present in 1 sibling with schizotypal personality disorder or 2 with major depression. Of 2 more distant family members diagnosed with schizophrenia, one is from the maternal side and therefore very unlikely to carry the frameshift, and the second was unavailable for testing. The link between this frameshift mutation and schizophrenia thus remains unclear, although if a stable, truncated protein were expressed in the brain (not tested), then it would be predicted to reduce the capacity for specific DISC1 protein interactions.

### Population-Based Genetic Evidence

Despite the fact that the translocation breakpoint in the large Scottish family provided convincing evidence for the involvement of 1q42 and *DISC1* in the etiology of major mental illness, the outstanding question was whether *DISC1* had any relevance to the “at-risk” population at large. The studies performed in Finland were the first to

provide such support and have been a continual and up-to-date source of evidence for *DISC1* since.

Finland offers an ideal framework for studies of complex disorders by virtue of its relative genetic and environmental homogeneity, the existence of comprehensive health registries, and the consistency of medical training.<sup>15,16</sup> A number of linkage-based studies have been published at various stages in the Finnish sample collection, with chromosome 1q linkage and association being the most consistent observation. Prior to the discovery of *DISC1*, Hovatta and colleagues published the finding of a haplotype linked to schizophrenia ( $Z_{\max} = 3.82$ ) that spanned from 1q32.2 to 1q41 in an internal subisolate of Finland.<sup>17</sup> Two years later Ekelund and colleagues reported on a fine-mapping study of chromosome 1, using families ascertained from all over Finland.<sup>18</sup> The *DISC1* intragenic marker *DIS2709* showed evidence for linkage to schizophrenia in the whole population of Finland ( $Z_{\max} = 2.71$ ), with the strongest evidence being from those families not originating from the internal subisolate ( $Z_{\max} = 3.21$ ).<sup>18</sup> Since then, the Finnish family sample has been expanded with more families participating in the study. This enabled Ekelund and colleagues to revisit the findings on chromosome 1 with the use of a completely independent, but identically ascertained, sample. Once again, linkage was observed with a marker intragenic of *DISC1*, this time with a single nucleotide polymorphism (SNP) marker (rs1000731, LOD = 2.70),<sup>19</sup> at a level that surpasses the threshold for replication set in Lander and Kruglyak’s seminal paper.<sup>20</sup> This was followed up with an association analysis, which identified a 3 SNP haplotype that was overtransmitted to affected individuals in these families.<sup>19</sup>

Chronologically after, but published before this finding, a follow-up study monitored the allelic diversity of the 1q42 region in what was then the largest Finnish family cohort, consisting of 495 nuclear families. Hennah and colleagues reported the identification of 4 restricted loci, named HEP haplotypes, which associated with a broad diagnostic criterion that consisted primarily of schizophrenia, but also included individuals affected with other schizophrenia spectrum diagnoses, as well as affective disorders.<sup>21</sup> The most statistically robust among the 4 observed haplotypes was the HEP3 haplotype, which consisted of 2 *DISC1* SNPs, including the nonsynonymous rs3738401 (Arg264Gln) located in *DISC1* exon 2.<sup>21</sup> Intriguingly, this observation was for significant undertransmission of the haplotype to affected female individuals.

Dichotomized traits based on factor analysis of the Operational Criteria Checklist of Psychotic Illness<sup>22</sup> were used to further the association study in Finnish families. The HEP3 haplotype was found to be associated to traits representing negative symptoms, and delusions and hallucinations.<sup>21</sup> Parallel studies in 2 independent Finnish study samples further refined the interpretation of the

*DISC1* “risk” phenotype. Gasperoni and colleagues analyzed the markers within the “Hovatta” haplotype in a sample of twins, containing concordant and discordant pairs with schizophrenia and a set of unaffected pairs. The most telomeric (1q41) markers provided increasing evidence of association to neurocognitive endophenotypes of schizophrenia that represent spatial and visual working memory.<sup>23</sup> When Paunio and colleagues performed genome-wide analyses for neurocognitive traits in a subset of the Finnish families, evidence of linkage (LOD > 1.5) was noted at the 1q41-q42 locus for 3 traits representative of verbal memory functions.<sup>24</sup> On direct testing for association to these neurocognitive endophenotypes of schizophrenia in Finnish families, the HEP3 haplotype was observed to associate with poorer performance in males for a task representative of visual working memory.<sup>25</sup> The apparent paradox—between this observed poorer performances in males compared with the original undertransmission to females—led Hennah and colleagues to reevaluate their original finding using a population-based control sample. They concluded that the schizophrenia family sample has an overrepresentation of the HEP3 allelic haplotype, which resulted in the observation of the epiphenomenon of undertransmission to affected females, when there was really overtransmission to affected males.<sup>25</sup> The HEP haplotypes were also analyzed in the twin sample for association to neurocognitive traits and neuroimaging-based phenotypes. Cannon and colleagues observed that the haplotypes displayed association toward spatial and visual working memory functions and to reduced gray matter volume in the dorsolateral prefrontal cortex.<sup>26</sup>

The next general question was whether linkage and association would be seen for *DISC1* in populations other than Finland and, if so, to which traits. Linkage for 1q42 has now been reported in other populations for schizophrenia,<sup>27</sup> schizoaffective disorder,<sup>28</sup> and bipolar affective disorder.<sup>29–31</sup> Likewise, association for *DISC1* has been observed to schizophrenia, schizoaffective disorder, bipolar affective disorder, and major depression,<sup>32–35</sup> working memory functions,<sup>36</sup> cognition and cognitive aging,<sup>33,37</sup> and abnormalities in hippocampal structure and function.<sup>33</sup> Consequently, *DISC1* is now regarded as one of the best replicated genetic findings with biological plausibility for major mental illness.<sup>38</sup> To date, there have been 2 negative reports,<sup>39,40</sup> with independent groups utilizing the Japanese population not observing any association between the SNPs they tested and schizophrenia. However, 1 of these studies only looked at 5 SNPs in the *DISC1* promoter region and did not attempt to define the allelic spectrum of the 1q42 locus.<sup>39</sup> A visual summary of the published findings for the *DISC1* region on 1q is presented in Figure 1.

Interestingly, many of these studies report a sex-dependent effect. In addition to the observations with HEP3 in the Finnish families, before their reevaluation,

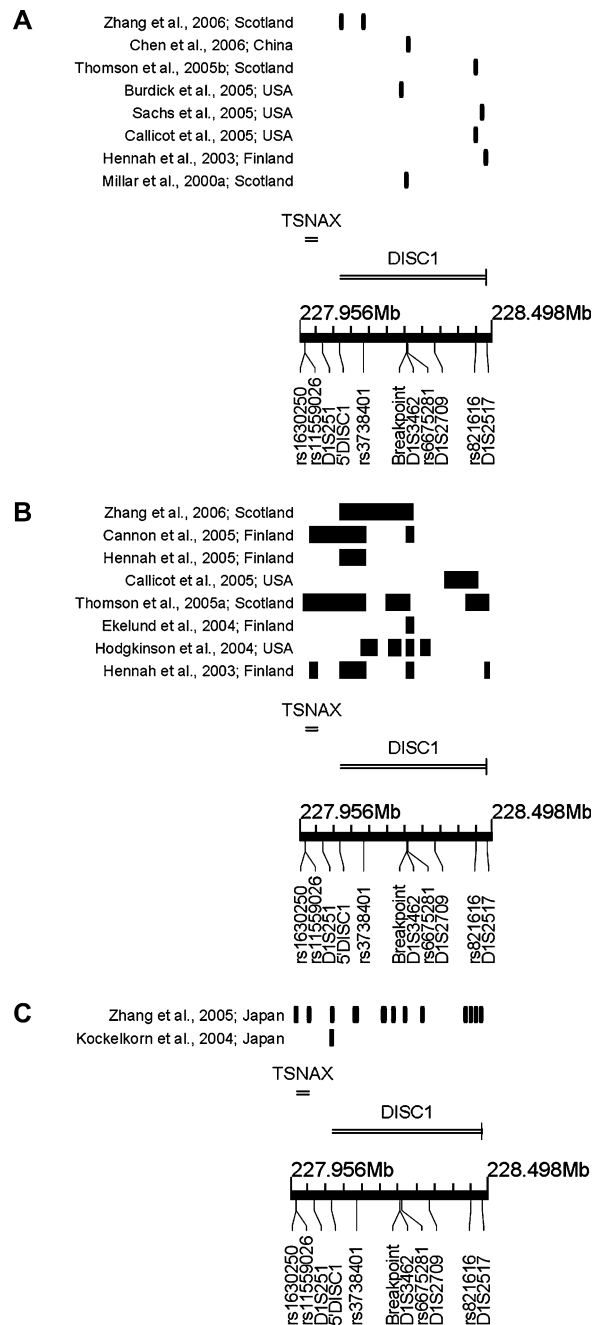

**Fig. 1.** Overview of the Published Findings on *DISC1* and *TSNAX* (*TRAX*), Produced Using the LocusView Program (Petryshen T, Kirby A, Ainscow M., unpublished software) and Edited. (a) Reported findings at single loci. (b) Reported findings based on haplotypes. (c) The location of the markers used for analysis in the two studies that have not observed association to this region. The markers named at the bottom of each figure are to show the locations of the microsatellite markers and the nonsynonymous SNPs within the region, as well as the location of the original translocation breakpoint.

the undertransmission to females of the same HEP3 allelic haplotype was reported in an American sample using a case-control study design.<sup>32</sup> Further, Thomson and colleagues<sup>35</sup> described 3 restricted regions of the 1q42 locus that associate with either schizophrenia or bipolar disorder in Scottish sample material. In each region sex differences were observed, region 1 being male-specific, region 2 being female-specific, and region 3 showing a variable pattern, depending on the allelic haplotype tested.<sup>35</sup> Analysis of the relationship between *DISC1* and cognitive aging in an elderly Scottish cohort again showed sex-specific effects, the genotype of T/T at rs821616 (Ser704Cys) appearing to be protective in males, but detrimental in females, for a task of verbal reasoning.<sup>37</sup> Most recently, in a genome-wide scan focusing on schizoaffective disorder, Hamshere and colleagues reported that their observed linkage on 1q42.2 increased when sex was taken as a covariate, noting that allele sharing was increased at this locus between male-male and female-female siblings when compared with male-female siblings.<sup>28</sup>

Although there seems to be plenty of genetic evidence for the involvement of *DISC1*, observations have been to multiple allelic variations from restricted regions located throughout the 1q42 locus. The primary reason for this is that the association studies reported to date have selected different SNP sets for typing. In those studies that do report association with a single SNP, it is either weak,<sup>41</sup> rare,<sup>21</sup> surpassed by haplotype observations,<sup>33–35</sup> or only 1 SNP has been tested.<sup>37</sup> Systematic analysis of the locus, to capture the full extent of genetic variation at the *DISC1* locus, needs to be performed in a large study sample to be able to define the specific allele(s) or variants associated with psychiatric disorders or their trait components in different populations.

### The Biology of *DISC1*

Human *DISC1* is a large gene containing 13 exons spanning over 410 kilobase pairs of genomic DNA. The N-terminal region of the protein is predicted to form 1 or more globular head domains, while the C-terminal contains regions of coiled-coil forming potential.<sup>5</sup> A bipartite nuclear localization signal (NLS) and 3 leucine zipper motifs are also present. Analysis of human transcripts has identified 4 *DISC1* isoforms (long, L; long variant, Lv; short, S; and extra short, Es), resulting in multiple protein isoforms. The proteins predicted from these transcripts contain some, but not all, of the known binding sites for *DISC1* interacting molecules, perhaps indicating different functional roles. The relationship between the transcripts and protein isoforms has not been formally identified.

Immunostaining with *DISC1* antibodies has shown that *DISC1* occupies multiple subcellular locations, including mitochondria, cytoplasmic puncta/stress granules, the nucleus, centrosome, and actin filaments.<sup>42–49</sup>

Human *DISC1* is widely expressed in tissues including the brain, heart, liver, kidney, placenta, and limb.<sup>6,45</sup> Within the brain, expression is strongest in the hippocampus within the granule cells of the dentate gyrus and pyramidal cells.<sup>45</sup> Quantitative PCR from human hippocampal mRNA detects only the L and Lv transcripts with no amplification detected for the Es or S forms.<sup>50</sup> This suggests that these 2 long isoforms, containing the binding sites of the C-terminus, are the predominant transcripts in the adult hippocampus. Interestingly, both the mutated *DISC1* genes so far identified in families would affect these binding sites. In rodents, the expression of the L transcript appears to be developmentally regulated.<sup>43,51</sup> Expression of mouse full-length *Disc1* peaks at E13.5, consistent with neurogenesis and cellular migration in the brain, and postnatally at P35, consistent with the onset of puberty in mice.<sup>51</sup> This would suggest a role for *DISC1* in corticogenesis and synaptic remodeling, again consistent with the high expression of *DISC1* in the dentate gyrus and the olfactory bulb, as these are sites of adult neurogenesis.<sup>51,52</sup>

*DISC1* involvement in neurite extension has been demonstrated in experiments both with full-length *DISC1* and truncated *DISC1*.<sup>42,53</sup> *DISC1* enhanced neurite extension through an up regulation of its interaction with FEZ1.<sup>43</sup> Despite indications from *DISC1* interacting proteins, until recently the involvement of *DISC1* in neuronal migration had not been demonstrated. However, RNAi experiments in mouse embryonic brains have clearly shown delays in neuronal migration and reduced dendritic arborization when *DISC1* is down regulated.<sup>53</sup> Many of these biological functions are consistent with the psychological<sup>25,26,33,36,37</sup> and neuroimaging<sup>26,33</sup> phenotypes observed to associate with *DISC1* in genetic analysis. Indeed recently, it was reported that the 129S6/SvEv strain of mouse is homozygous for a 25 base pair (bp) *Disc1* deletion, which introduces a premature stop codon in exon 7.<sup>54</sup> Initial examination showed no gross brain structural differences, but when the 129 *Disc1* variant was bred onto a C57BL/6 genetic background, the *Disc1* mutant mice performed poorly in tests of spatial working memory compared to C57 controls. The 129 strain is the most common genetic background used for making knock-out mice. These are then typically bred onto another genetic background, but the phenotypes ascribed to, for example *Ndel1*<sup>55</sup> and *Lis1*<sup>56</sup> knock-outs should be reevaluated in the light of this new knowledge with respect to *Disc1* status.

To summarize, not only is *DISC1* expressed in regions of the brain of relevance to psychiatric illness,<sup>57</sup> but also perturbation of *DISC1* function results in phenotypes consistent with current theories relating to mental illness. Furthermore, studies of *DISC1* may allow us to determine the mechanisms through which psychiatric medications work, or to devise new ones. It has been shown, for example, that the expression of *DISC1* is increased in the

hippocampus and frontal cortex in mice treated with atypical antipsychotic medication.<sup>58</sup> The sites of interaction between DISC1 and its binding partners could be targeted using small molecules or affinity reagents to modulate these interactions.

### Parallel Evidence: The DISC1 Pathway

Currently, the functions ascribed to DISC1 are largely inferences from the known functions of the proteins that interact with DISC1. It is therefore suggested to play a role in neuronal migration, neurite outgrowth, signal transduction, cyclic adenosine monophosphate (cAMP) signaling, cytoskeleton modulation, and translational regulation (Table 1). The interaction with DISC1 appears to be crucial to the activity of at least some of these proteins, with studies showing that binding to DISC1 modulates the function of FEZ1, NDEL1, and PDE4B.<sup>13,42,59</sup> Future investigations will hopefully elucidate the molecular mechanism by which DISC1 regulates the activity of these protein-binding partners, leading to a better understanding of the role of DISC1 at the cellular level and ultimately at the level of brain function.

Even at this stage of partial knowledge, a reasonable hypothesis would be that disruption of other components of the DISC1 pathway could influence susceptibility to schizophrenia and related disorders. Support for this hypothesis comes from initial evidence from human and animal studies. FEZ1 was observed to associate with schizophrenia for homozygous carriers of 2 rare SNPs in the Japanese population.<sup>60</sup> PDE4B has been found to be disrupted by a translocation breakpoint in 2 related individuals with psychosis in Scotland.<sup>13</sup> Most recently, NDE1 has been observed to be overtransmitted to affected females with a broad spectrum of schizophrenia-related illnesses in the same Finnish families that originally highlighted DISC1 (Hennah et al., meeting abstract, *Am J Med Genet B Neuropsychiatr Genet.* 2005; 138B:123). The LIS1, NDE1, and NDEL1 genes are involved in neuronal migration. Knock-out models of these genes display disruptions of cortical and hippocampal organization,<sup>55,56,61,62</sup> lending credence to the genetic findings linking DISC1 to gray matter volume in the dorsolateral prefrontal cortex<sup>26</sup> and abnormalities in the hippocampus in humans.<sup>33</sup> A recent expression study compared mRNA levels between the postmortem tissue of patients with schizophrenia and controls. Although

**Table 1.** DISC1 Interacting Partners

| Gene <sup>#</sup>          | Location     | Function                 | Genetic Evidence                      | Animal Model                                                                 | Expression Evidence <sup>50</sup>               |
|----------------------------|--------------|--------------------------|---------------------------------------|------------------------------------------------------------------------------|-------------------------------------------------|
| <i>PDE4B</i> <sup>13</sup> | 1p31.2       | cAMP signaling           | Millar et al. (2005) <sup>13</sup>    | Learning and memory <sup>63</sup>                                            |                                                 |
| <i>MIP-T3</i>              | 2q37.3       | Signal transduction      |                                       |                                                                              |                                                 |
| <i>PDE4D</i> <sup>13</sup> | 5q11.2-q12.1 | cAMP signaling           |                                       | Learning and memory <sup>63</sup>                                            |                                                 |
| <i>FEZ1</i>                | 11q24.2      | Neurite outgrowth        | Yamada et al. (2004) <sup>60</sup>    |                                                                              | Decreased in DLPFC <sup>^</sup> and hippocampus |
| <i>MAP1A</i>               | 15q15.3      | Neurite outgrowth        |                                       |                                                                              |                                                 |
| <i>NDE1</i>                | 16p13        | Neuronal migration       | Hennah et al. (2005) meeting abstract | Disordered cortex <sup>62</sup>                                              |                                                 |
| <i>LIS1</i>                | 17p13.3      | Neuronal migration       |                                       | Learning and memory; <sup>61</sup> Neuronal migration deficits <sup>56</sup> | Decreased in hippocampus                        |
| <i>NDEL1</i>               | 17p13.1      | Neuronal migration       |                                       | Neuronal migration deficits <sup>55</sup>                                    | Decreased in hippocampus                        |
| <i>ATF5</i>                | 19q13.33     | Signal transduction      |                                       |                                                                              |                                                 |
| <i>PCNT2</i>               | 21q22.3      | Cytoskeletal modulation  |                                       |                                                                              |                                                 |
| <i>ATF4</i>                | 22q13.1      | Signal transduction      |                                       |                                                                              |                                                 |
| Dynactin <sup>53</sup>     | multiple     | Neuronal migration       |                                       |                                                                              |                                                 |
| Dynein <sup>53</sup>       | multiple     | Neuronal migration       |                                       |                                                                              |                                                 |
| <i>eIF3</i> <sup>47</sup>  | multiple     | Translational regulation |                                       |                                                                              |                                                 |
| tubulin                    | multiple     | Cytoskeletal Modulation  |                                       |                                                                              |                                                 |

*Note:* This table shows DISC1 binding partners, their function, and evidence for a possible role in mental illness. The functions ascribed to DISC1 are largely through interpretation based on the known functions of these proteins.

<sup>#</sup>See<sup>35</sup> unless otherwise stated.

<sup>^</sup>DLPFC = dorsolateral prefrontal cortex.

the researchers were unable to observe a significant difference in the *DISC1* mRNA expression, their analysis of transcript levels of 3 *DISC1* binding partners showed such a difference. The steady state transcript levels of *NDE1*, *LIS1*, and *FEZ1* all showed reduced quantities in the hippocampus, with *FEZ1* also showing reduction of expression in the dorsolateral prefrontal cortex.<sup>50</sup> Lipska and colleagues also state that this reduced expression is associated with the rs821616 (Ser704Cys) polymorphism in the *DISC1* gene.<sup>50</sup> However, the data presented is unclear as to whether this is an epiphenomenon of the fact that both the polymorphism and expression levels associate with schizophrenia, since similar association was not observed in the control samples.

Further, *DISC1* has been shown to interact dynamically in a cAMP dependent manner with Phosphodiesterase 4B (PDE4B), which is the sole mechanism for inactivation of cellular cAMP, a key signaling molecule in the brain. Additionally, PDE4 is the pharmacological target for the antidepressant Risperidone.<sup>13</sup> *PDE4B* and *PDE4D* are homologs of the fruit fly dunce gene, null mutations that give rise to a profound learning and memory deficit.<sup>63</sup> Mouse mutants of *PDE4B* and *PDE4D* display behaviors that mimic the effects of antidepressants on normal mice.<sup>64,65</sup> These observations provide a potential mechanistic link of *DISC1*-PDE4B to learning and memory and an etiological link between schizophrenia and bipolar disorder.<sup>13</sup>

Although the recent focus of research in psychiatric genetics has been on *DISC1*, it is now clear from the emerging biology that this should be broadened to consider the wider *DISC1* pathway.

## Conclusions

Genetic associations with *DISC1* have been demonstrated for multiple psychiatric illnesses, with certain psychological traits, and with aspects of brain physiology and anatomy. *DISC1* has also been shown to interact with multiple proteins involved in functions thought to be highly relevant to the development of mental illness. The evidence is that *DISC1* and a number of interacting proteins function in neuronal migration, cortical layering during fetal brain development, hippocampal formation, and probably adult neurogenesis in the dentate gyrus, all of which is consistent with the neurodevelopmental hypothesis of schizophrenia. It seems clear that the interacting proteins of the *DISC1* pathway are functional candidates for involvement in neurodevelopmental and psychiatric disorders, for which there is already some supporting genetic evidence. If, as now appears likely, the *DISC1* pathway is critical for normal brain development, then it will be of great interest to test this in pediatric and adolescent brain developmental and psychiatric disorders. Further, the dynamic interaction between *DISC1* and PDE4 suggests a role in synaptic remodeling

and learning and memory, an imbalance of which may also underlie fundamental features of schizophrenia and related disorders in adults. The role of *DISC1* at these 2 key time points in the development of many mental illnesses is emphasized through the evidence that its expression levels peak at the equivalent developmental stages in mice.<sup>51</sup>

To conclude, the evidence for *DISC1* being a causal factor in major mental illness is strongly supported by a raft of independent genetic studies and by the growing evidence from biological studies. That said, with the exception of the t(1;11), the data for explanatory functional variants in the gene and protein are still lacking. Much still needs to be understood about the biology of *DISC1* and of *DISC1* interacting partners, in human and other species. However, the *DISC1* pathway currently offers avenues for exploring the molecular etiology of both normal and abnormal brain development. Such studies have the potential to produce new levels of understanding and possibly more effective interventions for disorders that are among the most common and debilitating of human conditions, major mental illness.

## Acknowledgments

We would like to acknowledge the Academy of Finland Center of Excellence in Disease Genetics and Nordic Center of Excellence in Disease Genetics for supporting the continual work in Finland. The Biocentrum Helsinki, GenomeUtwinn, supported by the European Commission under the program "Quality of Life and Management of the Living Resources" of the 5th Framework Programme (QLG2-CT-2002-01254) and SGENE STREP of the 6th Framework Programme are also acknowledged. Hennah is funded by the Finnish Cultural Foundation, Piippa-Stiina Immonen Grant. Porteous and Thomson are supported by the UK Medical Research Council. Authors Hennah and Thomson contributed equally to this work.

## References

1. Williams NM, O'Donovan MC, Owen MJ. Is the dysbindin gene (*DTNBP1*) a susceptibility gene for schizophrenia? *Schizophr Bull.* 2005;31:800–805.
2. Tosato S, Dazzan P, Collier D. Association between the neuregulin 1 gene and schizophrenia: a systematic review. *Schizophr Bull.* 2005;31:613–617.
3. Breakthrough of the year: the runners-up. *Science.* 2005; 310:1880–1885.
4. Muir WJ, Gosden CM, Brookes AJ, et al. Direct microdissection and microcloning of a translocation breakpoint region, t(1;11)(q42.2;q21), associated with schizophrenia. *Cytogenet Cell Genet.* 1995;70:35–40.
5. Millar JK, Wilson-Annan JC, Anderson S, et al. Disruption of two novel genes by a translocation co-segregating with schizophrenia. *Hum Mol Genet.* 2000;9:1415–1423.

6. Millar JK, Christie S, Semple CA, Porteous DJ. Chromosomal location and genomic structure of the human translin-associated factor X gene (*TRAX*; *TSNAX*) revealed by intergenic splicing to *DISC1*, a gene disrupted by a translocation segregating with schizophrenia. *Genomics*. 2000;67:69–77.
7. St Clair D, Blackwood D, Muir W, et al. Association within a family of a balanced autosomal translocation with major mental illness. *Lancet*. 1990;336:13–16.
8. Blackwood DH, Fordyce A, Walker MT, St Clair DM, Porteous DJ, Muir WJ. Schizophrenia and affective disorders: cosegregation with a translocation at chromosome 1q42 that directly disrupts brain-expressed genes: clinical and P300 findings in a family. *Am J Hum Genet*. 2001;69:428–433.
9. Millar JK, Thomson PA, Wray NR, Muir WJ, Blackwood DH, Porteous DJ. Response to Amar J. Klar: The chromosome 1;11 translocation provides the best evidence supporting genetic etiology for schizophrenia and bipolar affective disorders. *Genetics*. 2003;163:833–835.
10. Blackwood DH, St Clair DM, Muir WJ, Duffy JC. Auditory P300 and eye tracking dysfunction in schizophrenic pedigrees. *Arch Gen Psychiatry*. 1991;48:899–909.
11. Sham PC, Morton NE, Muir WJ, et al. Segregation analysis of complex phenotypes: an application to schizophrenia and auditory P300 latency. *Psychiatr Genet*. 1994;4:29–38.
12. Weisbrod M, Hill H, Niethammer R, Sauer H. Genetic influence on auditory information processing in schizophrenia: P300 in monozygotic twins. *Biol Psychiatry*. 1999;46:721–725.
13. Millar JK, Pickard BS, Mackie S, et al. *DISC1* and *PDE4B* are interacting genetic factors in schizophrenia that regulate cAMP signaling. *Science*. 2005;310:1187–1191.
14. Sachs NA, Sawa A, Holmes SE, Ross CA, Delisi LE, Margolis RL. A frameshift mutation in *Disrupted in Schizophrenia 1* in an American family with schizophrenia and schizoaffective disorder. *Mol Psychiatry*. 2005;10:758–764.
15. Hovatta I, Terwilliger JD, Lichtermann D, et al. Schizophrenia in the genetic isolate of Finland. *Am J Med Genet*. 1997;74:353–360.
16. Varilo T, Peltonen L. Isolates and their potential use in complex gene mapping efforts. *Curr Opin Genet Dev*. 2004;14:316–323.
17. Hovatta I, Varilo T, Suvisaari J, et al. A genomewide screen for schizophrenia genes in an isolated Finnish subpopulation, suggesting multiple susceptibility loci. *Am J Hum Genet*. 1999;65:1114–1124.
18. Ekelund J, Hovatta I, Parker A, et al. Chromosome 1 loci in Finnish schizophrenia families. *Hum Mol Genet*. 2001;10:1611–1617.
19. Ekelund J, Hennah W, Hiekkalinna T, et al. Replication of 1q42 linkage in Finnish schizophrenia pedigrees. *Mol Psychiatry*. 2004;9:1037–1041.
20. Lander E, Kruglyak L. Genetic dissection of complex traits: guidelines for interpreting and reporting linkage results. *Nat Genet*. 1995;11:241–247.
21. Hennah W, Varilo T, Kestila M, et al. Haplotype transmission analysis provides evidence of association for *DISC1* to schizophrenia and suggests sex-dependent effects. *Hum Mol Genet*. 2003;12:3151–3159.
22. McGuffin P, Farmer AE, Harvey I. A polydiagnostic application of operational criteria in studies of psychotic illness: development and reliability of the OPCRIT system. *Arch Gen Psychiatry*. 1991;48:764–770.
23. Gasperoni TL, Ekelund J, Huttunen M, et al. Genetic linkage and association between chromosome 1q and working memory function in schizophrenia. *Am J Med Genet B Neuropsychiatr Genet*. 2003;116B:8–16.
24. Paunio T, Tuulio-Henriksson A, Hiekkalinna T, et al. Search for cognitive trait components of schizophrenia reveals a locus for verbal learning and memory on 4q and for visual working memory on 2q. *Hum Mol Genet*. 2004;13:1693–1702.
25. Hennah W, Tuulio-Henriksson A, Paunio T, et al. A haplotype within the *DISC1* gene is associated with visual memory functions in families with a high density of schizophrenia. *Mol Psychiatry*. 2005;10:1097–1103.
26. Cannon TD, Hennah W, van Erp TG, et al. Association of *DISC1/TRAX* haplotypes with schizophrenia, reduced prefrontal gray matter, and impaired short- and long-term memory. *Arch Gen Psychiatry*. 2005;62:1205–1213.
27. Hwu HG, Liu CM, Fann CS, Ou-Yang WC, Lee SF. Linkage of schizophrenia with chromosome 1q loci in Taiwanese families. *Mol Psychiatry*. 2003;8:445–452.
28. Hamshere ML, Bennett P, Williams N, et al. Genome-wide linkage scan in schizoaffective disorder: significant evidence for linkage at 1q42 close to *DISC1*, and suggestive evidence at 22q11 and 19p13. *Arch Gen Psychiatry*. 2005;62:1081–1088.
29. Curtis D, Kalsi G, Brynjolfsson J, et al. Genome scan of pedigrees multiply affected with bipolar disorder provides further support for the presence of a susceptibility locus on chromosome 12q23–q24, and suggests the presence of additional loci on 1p and 1q. *Psychiatr Genet*. 2003;13:77–84.
30. Macgregor S, Visscher PM, Knott SA, et al. A genome scan and follow-up study identify a bipolar disorder susceptibility locus on chromosome 1q42. *Mol Psychiatry*. 2004;9:1083–1090.
31. Detera-Wadleigh SD, Badner JA, Berrettini WH, et al. A high-density genome scan detects evidence for a bipolar-disorder susceptibility locus on 13q32 and other potential loci on 1q32 and 18p11.2. *Proc Natl Acad Sci U S A*. 1999;96:5604–5609.
32. Hodgkinson CA, Goldman D, Jaeger J, et al. *Disrupted in Schizophrenia 1* (*DISC1*): association with schizophrenia, schizoaffective disorder, and bipolar disorder. *Am J Hum Genet*. 2004;75:862–872.
33. Callicott JH, Straub RE, Pezawas L, et al. Variation in *DISC1* affects hippocampal structure and function and increases risk for schizophrenia. *Proc Natl Acad Sci U S A*. 2005;102:8627–8632.
34. Zhang F, Sarginson J, Crombie C, Walker N, St Clair D, Shaw D. Genetic association between schizophrenia and the *DISC1* gene in the Scottish population. *Am J Med Genet B Neuropsychiatr Genet*. 2006;141:155–159.
35. Thomson PA, Wray NR, Millar JK, et al. Association between the *TRAX/DISC* locus and both bipolar disorder and schizophrenia in the Scottish population. *Mol Psychiatry*. 2005;10:657–668, 616.
36. Burdick KE, Hodgkinson CA, Szeszko PR, et al. *DISC1* and neurocognitive function in schizophrenia. *Neuroreport*. 2005;16:1399–1402.
37. Thomson PA, Harris SE, Starr JM, Whalley LJ, Porteous DJ, Deary IJ. Association between genotype at an exonic SNP in *DISC1* and normal cognitive aging. *Neurosci Lett*. 2005;389:41–45.
38. Harrison PJ, Weinberger DR. Schizophrenia genes, gene expression, and neuropathology: on the matter of their convergence. *Mol Psychiatry*. 2005;10:40–68.
39. Kockelkorn TT, Arai M, Matsumoto H, et al. Association study of polymorphisms in the 5' upstream region of human

- DISC1 gene with schizophrenia. *Neurosci Lett.* 2004;368:41–45.
40. Zhang X, Tochigi M, Ohashi J, et al. Association study of the DISC1/TRAX locus with schizophrenia in a Japanese population. *Schizophr Res.* 2005;79:175–180.
  41. Chen QY, Chen Q, Feng GY, et al. Case-control association study of Disrupted-in-Schizophrenia-1 (DISC1) gene and schizophrenia in the Chinese population. *J Psychiatr Res.* 2006;doi:10.1016/j.jpsychires.2006.1001.1001. Accessed April 21, 2006.
  42. Miyoshi K, Honda A, Baba K, et al. Disrupted-In-Schizophrenia 1, a candidate gene for schizophrenia, participates in neurite outgrowth. *Mol Psychiatry.* 2003;8:685–694.
  43. Ozeki Y, Tomoda T, Kleiderlein J, et al. Disrupted-in-Schizophrenia-1 (DISC-1): mutant truncation prevents binding to NudE-like (NUDEL) and inhibits neurite outgrowth. *Proc Natl Acad Sci U S A.* 2003;100:289–294.
  44. Morris JA, Kandpal G, Ma L, Austin CP. DISC1 (Disrupted-In-Schizophrenia 1) is a centrosome-associated protein that interacts with MAP1A, MIPT3, ATF4/5 and NUDEL: regulation and loss of interaction with mutation. *Hum Mol Genet.* 2003;12:1591–1608.
  45. James R, Adams RR, Christie S, Buchanan SR, Porteous DJ, Millar JK. Disrupted in Schizophrenia 1 (DISC1) is a multi-compartmentalized protein that predominantly localizes to mitochondria. *Mol Cell Neurosci.* 2004;26:112–122.
  46. Brandon NJ, Schurov I, Camargo LM, et al. Subcellular targeting of DISC1 is dependent on a domain independent from the Nudel binding site. *Mol Cell Neurosci.* 2005;28:613–624.
  47. Ogawa F, Kasai M, Akiyama T. A functional link between Disrupted-In-Schizophrenia 1 and the eukaryotic translation initiation factor 3. *Biochem Biophys Res Commun.* 2005;338:771–776.
  48. Sawamura N, Sawamura-Yamamoto T, Ozeki Y, Ross CA, Sawa A. A form of DISC1 enriched in nucleus: altered subcellular distribution in orbitofrontal cortex in psychosis and substance/alcohol abuse. *Proc Natl Acad Sci U S A.* 2005;102:1187–1192.
  49. Millar JK, James R, Christie S, Porteous DJ. Disrupted in Schizophrenia 1 (DISC1): subcellular targeting and induction of ring mitochondria. *Mol Cell Neurosci.* 2005;30:477–484.
  50. Lipska BK, Peters T, Hyde TM, et al. Expression of DISC1 binding partners is reduced in schizophrenia and associated with DISC1 SNPs. *Hum Mol Genet.* 2006;15:1245–1258.
  51. Schurov IL, Handford EJ, Brandon NJ, Whiting PJ. Expression of Disrupted in Schizophrenia 1 (DISC1) protein in the adult and developing mouse brain indicates its role in neurodevelopment. *Mol Psychiatry.* 2004;9:1100–1110.
  52. Cayre M, Malaterre J, Scotto-Lomassese S, Strambi C, Strambi A. The common properties of neurogenesis in the adult brain: from invertebrates to vertebrates. *Comp Biochem Physiol B Biochem Mol Biol.* 2002;132:1–15.
  53. Kamiya A, Kubo KI, Tomoda T, et al. A schizophrenia-associated mutation of DISC1 perturbs cerebral cortex development. *Nat Cell Biol.* 2005;7:1067–1078.
  54. Koike H, Arguello PA, Kvajo M, Karayiorgou M, Gogos JA. DISC1 is mutated in the 129S6/SvEv strain and modulates working memory in mice. *Proc Natl Acad Sci U S A.* 2006;103:3693–3697.
  55. Sasaki S, Mori D, Toyo-oka K, et al. Complete loss of Ndel1 results in neuronal migration defects and early embryonic lethality. *Mol Cell Biol.* 2005;25:7812–7827.
  56. Hirotsune S, Fleck MW, Gambello MJ, et al. Graded reduction of Pafah1b1 (Lis1) activity results in neuronal migration defects and early embryonic lethality. *Nat Genet.* 1998;19:333–339.
  57. Kasai K, Iwanami A, Yamasue H, Kuroki N, Nakagome K, Fukuda M. Neuroanatomy and neurophysiology in schizophrenia. *Neurosci Res.* 2002;43:93–110.
  58. Chiba S, Hashimoto R, Hattori S, et al. Effect of antipsychotic drugs on DISC1 and dysbindin expression in mouse frontal cortex and hippocampus. *J Neural Transm.* 2006;doi:10.1007/s00702-00005-00414-00701. Accessed April 21, 2006.
  59. Hayashi MA, Portaro FC, Bastos MF, et al. Inhibition of NUDEL (nuclear distribution element-like)-oligopeptidase activity by Disrupted-in-Schizophrenia 1. *Proc Natl Acad Sci U S A.* 2005;102:3828–3833.
  60. Yamada K, Nakamura K, Minabe Y, et al. Association analysis of FEZ1 variants with schizophrenia in Japanese cohorts. *Biol Psychiatry.* 2004;56:683–690.
  61. Paylor R, Hirotsune S, Gambello MJ, Yuva-Paylor L, Crawley JN, Wynshaw-Boris A. Impaired learning and motor behavior in heterozygous Pafah1b1 (Lis1) mutant mice. *Learn Mem.* 1999;6:521–537.
  62. Feng Y, Walsh CA. Mitotic spindle regulation by Ndel controls cerebral cortical size. *Neuron.* 2004;44:279–293.
  63. Cherry JA, Davis RL. A mouse homolog of dunce, a gene important for learning and memory in *Drosophila*, is preferentially expressed in olfactory receptor neurons. *J Neurobiol.* 1995;28:102–113.
  64. Zhang HT, Huang Y, Jin SL, et al. Antidepressant-like profile and reduced sensitivity to rolipram in mice deficient in the PDE4D phosphodiesterase enzyme. *Neuropsychopharmacology.* 2002;27:587–595.
  65. O'Donnell JM, Zhang HT. Antidepressant effects of inhibitors of cAMP phosphodiesterase (PDE4). *Trends Pharmacol Sci.* 2004;25:158–163.
